# Supplementary material for: Subtoxic Concentrations of Hepatotoxic Drugs Lead to Kupffer Cell Activation in a Human In Vitro Liver Model: An Approach to Study DILI
Source: PubMed Central journal article supplement (PMC4600928; doi:10.1155/2015/640631), 2015-09-28
Supplement: 640631.f1.pdf [file 640631.f1.pdf]

## Supplements

10% autologous serum 
  10% FCS 
  without serum

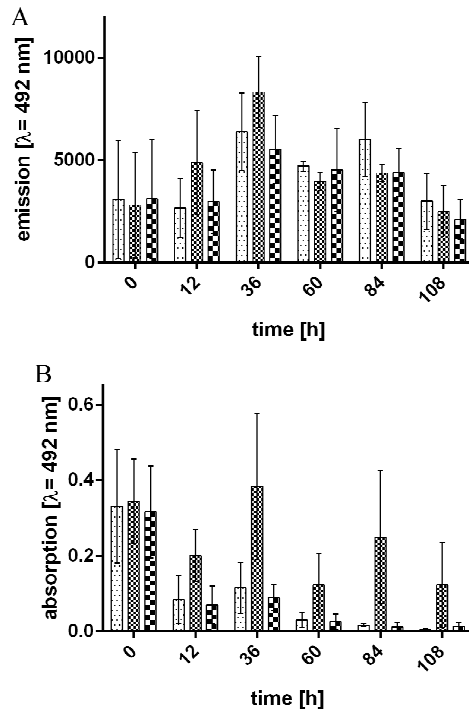

**Supp.-Fig. 1 Testing of different cell culture supplements for KC culture.** KC were cultured for up to 108 h using RPMI medium supplemented with 10% autologous serum, 10% FCS or without serum. The intracellular ROI formation (A) was investigated by the DCF-assay and the mitochondrial activity (B) by the XTT-assay. Data show means  $\pm$  SEM. N=3; n=3

control 
  10 mM ascorbic acid 
  10 mM n-acetyl cysteine

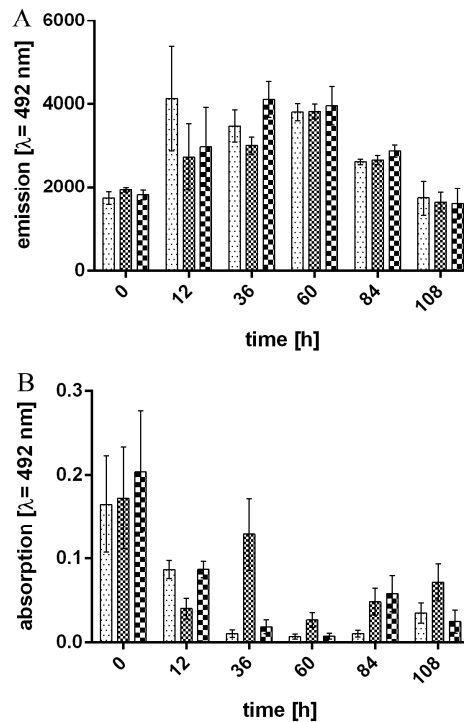

**Supp.-Fig. 2 Testing of antioxidant supplementation to reduce initial KC activation.** KC were cultured for up to 108 h using RPMI medium supplemented with or without 10 mM n-acetylcysteine or 10 mM ascorbic acid. The intracellular ROI formation (A) was investigated by the DCF-assay and the mitochondrial activity (B) by the XTT-assay. Data show means  $\pm$  SEM. N=3; n=3
